# Supplementary figures and images for: Health Surveillance and Response to SARS-CoV-2 Mass Testing in Health Workers of a Large Italian Hospital in Verona, Veneto
Source: MDPI journal article supplement (doi:10.3390/ijerph17145104), 2020-07-15

**Figure 3. Flow chart for INDETERMINATE swab**

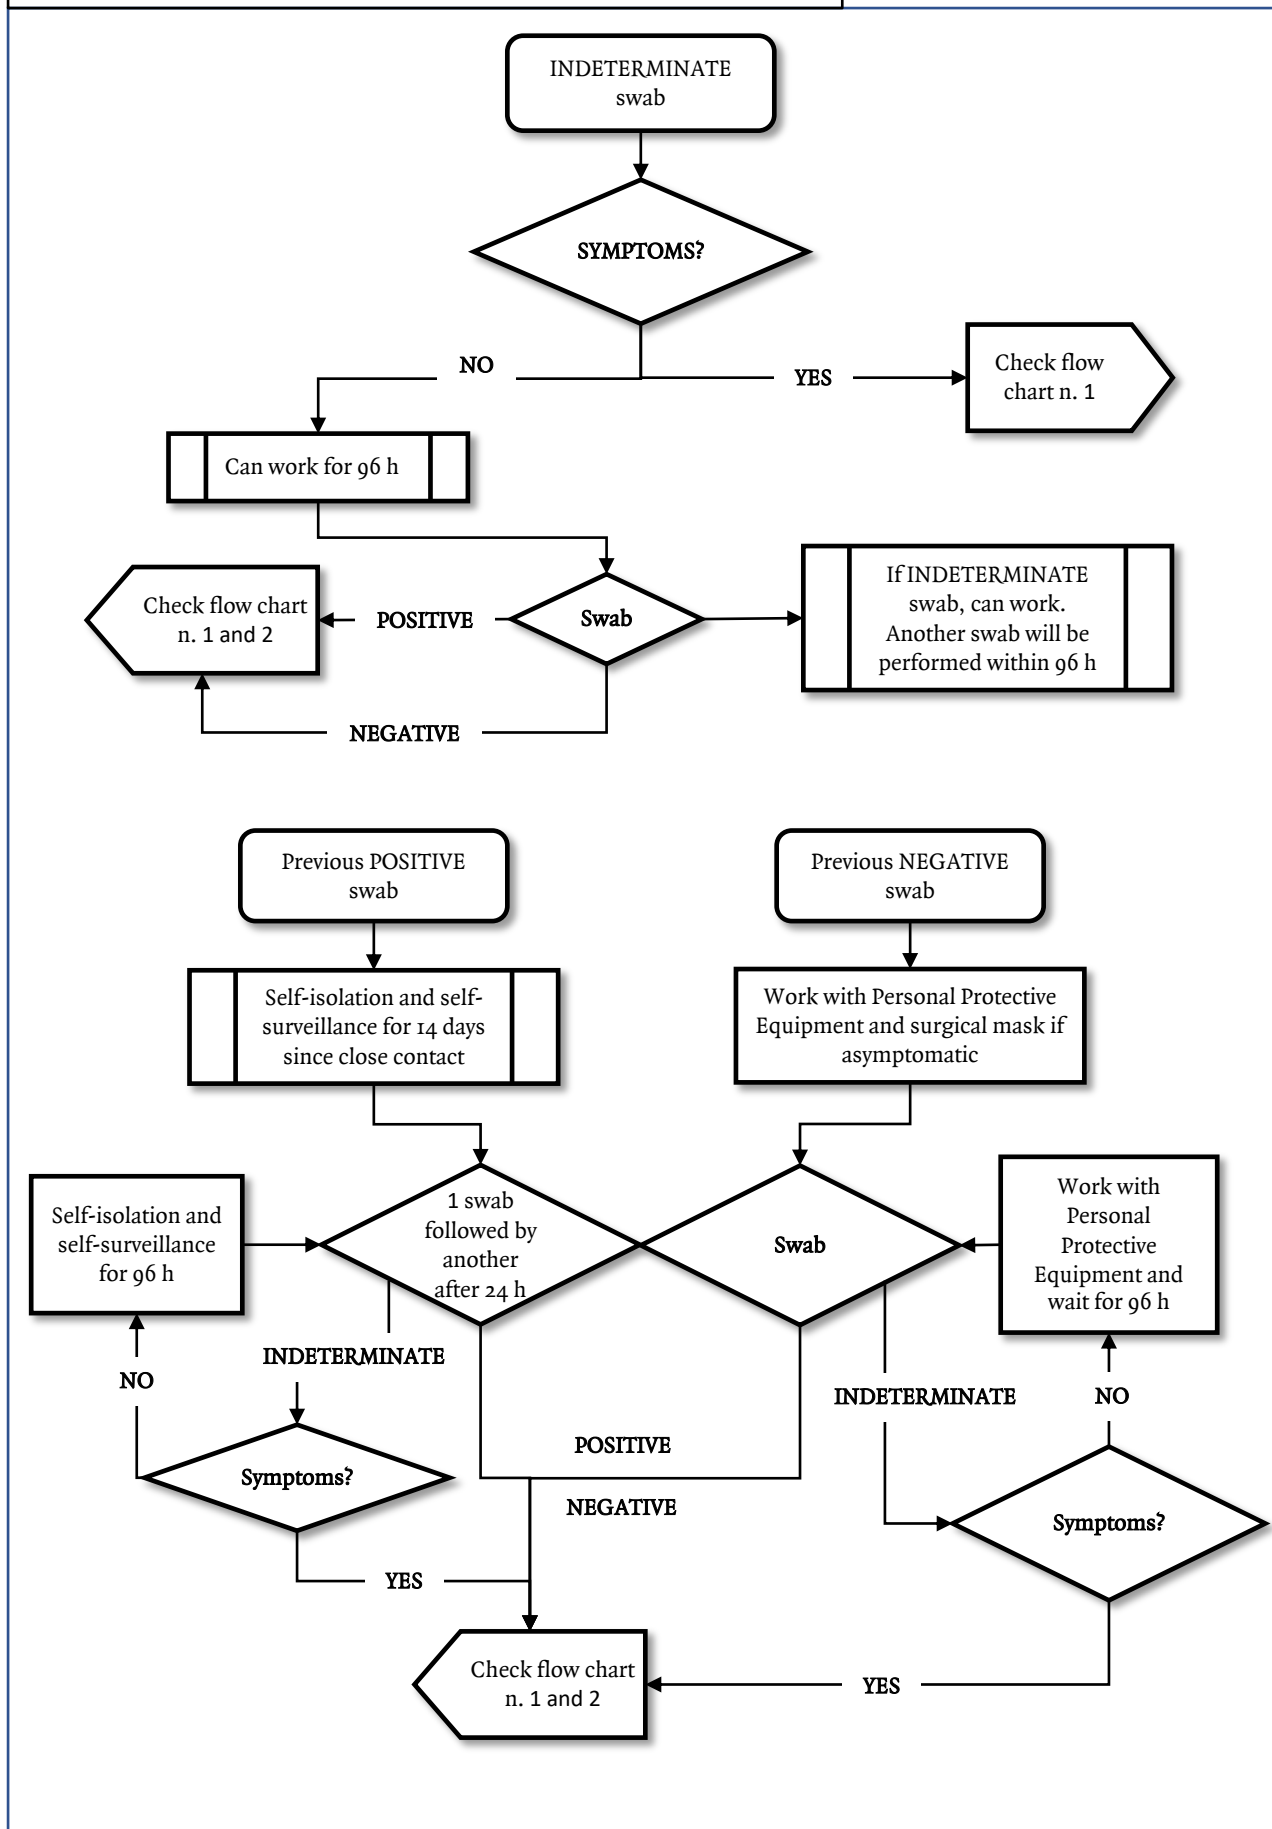

Supplement: s1 [file s1]
